# Supplementary material for: Perioperative Cetuximab with Cisplatin and 5-Fluorouracil in Esogastric Adenocarcinoma: A Phase II Study
Source: MDPI journal article supplement (doi:10.3390/cancers15072188), 2023-04-06
Supplement: s1 [file s1]

**Table S1: Cumulative doses and dose modifications during neoadjuvant treatment**

|                                                                                                       | N (%)             |
|-------------------------------------------------------------------------------------------------------|-------------------|
| Median duration of neoadjuvant chemotherapy, months                                                   | 2.3 [0.03-3.6]    |
| Percentage of administered dose/protocol theoretical dose per treatment on all cycles, median [range] |                   |
| Cetuximab                                                                                             | 96.9 [4.1-105.0]  |
| Cisplatin                                                                                             | 97.9 [16.8-105.0] |
| 5FU bolus                                                                                             | 97.0 [16.5-104.9] |
| 5FU continuous                                                                                        | 97.8 [16.7-104.8] |
| Treatment modification                                                                                |                   |
| <b>Cetuximab (n=362)</b>                                                                              |                   |
| - no modification                                                                                     | 329 (90.9)        |
| - hypersensibility                                                                                    | 6 (1.7)           |
| - skin toxicity                                                                                       | 2 (0.6)           |
| - haematologic toxicity                                                                               | 0 (0)             |
| - non haematologic toxicity                                                                           | 0 (0)             |
| - prescription error                                                                                  | 2 (0.6)           |
| - other                                                                                               | 23 (6.4)          |
| <b>Cisplatin (n=370)</b>                                                                              |                   |
| - no modification                                                                                     | 322 (87.3)        |
| - haematologic toxicity                                                                               | 31 (8.4)          |
| - haematologic toxicity + non haematologic toxicity                                                   | 7 (1.9)           |
| - non haematologic toxicity                                                                           | 6 (1.6)           |
| - prescription error                                                                                  | 0 (0)             |
| - other reason                                                                                        | 3 (0.8)           |
| <b>5FU (n=369)</b>                                                                                    |                   |
| -no modification                                                                                      | 314 (85.1)        |
| -haematologic toxicity                                                                                | 35 (9.5)          |
| - haematologic toxicity + non haematologic toxicity                                                   | 7 (1.9)           |
| - non haematologic toxicity                                                                           | 9 (2.4)           |
| - prescription error                                                                                  | 0 (0)             |
| - other                                                                                               | 4 (1.1)           |
| Cycle delay                                                                                           |                   |
| - At least one delay                                                                                  | 36 (55.4)         |
| - Number of cycle delay                                                                               | 44                |
| Reasons for cycle delay                                                                               |                   |
| - Department organization                                                                             | 9 (20.5)          |
| - Department organization + patient's will                                                            | 1 (2.3)           |

|                                             |           |
|---------------------------------------------|-----------|
| - Other reasons                             | 9 (20.5)  |
| - Toxicity                                  | 23 (52.3) |
| - Patient convenience                       | 2 (4.5)   |
| Reason for definitive stop of the treatment |           |
| -end of protocolary treatment               | 57 (89.1) |
| -investigator's decision                    | 7 (10.9)  |
| -major toxicity                             | 3         |
| -disease progression                        | 1         |
| - intercurrent event                        | 1         |
| - drop out                                  | 0         |
| -other reason                               | 2         |
| -patient convenience                        | 0 (0)     |
| -death                                      | 0(0)      |

**Table S2: Cross-tabulation of the radiological response obtained by the centralized review and the response given by the centers**

|                      | Response given by the centers |       |           |       |             |       |               |       | Total |        |
|----------------------|-------------------------------|-------|-----------|-------|-------------|-------|---------------|-------|-------|--------|
|                      | Partial response              |       | Stability |       | Progression |       | Not Evaluable |       |       |        |
|                      | N                             | %     | N         | %     | N           | %     | N             | %     | N     | %      |
| Centralized response |                               |       |           |       |             |       |               |       |       |        |
| Partial response     | 10                            | 58.82 | 7         | 41.18 | 0           | 0.00  | 0             | 0.00  | 17    | 100.00 |
| Stability            | 8                             | 22.86 | 21        | 60.00 | 2           | 5.71  | 4             | 11.43 | 35    | 100.00 |
| Progression          | 0                             | 0.00  | 3         | 50.00 | 2           | 33.33 | 1             | 16.67 | 6     | 100.00 |
| Not Evaluable        | 2                             | 28.57 | 2         | 28.57 | 1           | 14.29 | 2             | 28.57 | 7     | 100.00 |
| Total                | 20                            | 30.77 | 33        | 50.77 | 5           | 7.69  | 7             | 10.77 | 65    | 100.00 |

**Table S3: Cumulative doses and dose modifications during adjuvant treatment**

|                                                                                                                                                              | N (%)                                                                                |
|--------------------------------------------------------------------------------------------------------------------------------------------------------------|--------------------------------------------------------------------------------------|
| Median duration of neoadjuvant chemotherapy                                                                                                                  | 2.4 months [0.03 - 3.9]                                                              |
| Percentage of administered dose/protocol theoretical dose per treatment on all cycles, median [range]<br>Cetuximab<br>Cisplatin<br>5FU bolus<br>5FU continu  | <br>97.8 [13.2-117.4]<br>76.7 [11.6-104.5]<br>80.6 [16.7-104.4]<br>79.1 [16.7-104.3] |
| Dose reduction<br>Cetuximab<br>Cisplatin<br>5FU                                                                                                              | <br>17 (35.4)<br>29 (60.4)<br>27 (56.3)                                              |
| Treatment modification<br>Cetuximab (N=239)<br>- no modification<br>- skin toxicity<br>- haematologic toxicity<br>- haematologic + non haematologic toxicity | <br>192 (80.3)<br>3 (1.3)<br>1 (0.4)<br>3 (1.3)                                      |

|                                                                                                                                                                                                                                                                                                                                                 |                                                                                    |
|-------------------------------------------------------------------------------------------------------------------------------------------------------------------------------------------------------------------------------------------------------------------------------------------------------------------------------------------------|------------------------------------------------------------------------------------|
| <ul style="list-style-type: none"> <li>- non hematologic+ other reason</li> <li>-prescription error</li> <li>-other</li> </ul>                                                                                                                                                                                                                  | 3 (1.3)<br>2 (0.8)<br>35 (14.6)                                                    |
| <b>Cisplatin (N=236)</b> <ul style="list-style-type: none"> <li>- no modification</li> <li>- hematologic toxicity</li> <li>- hematologic toxicity + non hematologic toxicity</li> <li>- hematologic+other reason</li> <li>- non hematologic toxicity</li> <li>- other reason</li> </ul>                                                         | 136 (57.6)<br>54 (22.9)<br>15 (6.4)<br>4 (1.7)<br>23 (9.7)<br>4 (1.7)              |
| <b>5FU (N=244)</b> <ul style="list-style-type: none"> <li>- no modification</li> <li>- hematologic toxicity</li> <li>- hematologic toxicity + non hematologic toxicity</li> <li>- hematologic toxicity + other reason</li> <li>- non hematologic toxicity</li> <li>- non hematologic toxicity + other reason</li> <li>- other reason</li> </ul> | 134 (54.9)<br>46 (18.9)<br>15 (6.1)<br>3 (1.2)<br>31 (12.7)<br>1 (0.4)<br>14 (5.7) |
| <b>Cycle delay (n=48)</b> <ul style="list-style-type: none"> <li>- At least one delay</li> </ul>                                                                                                                                                                                                                                                | 29 (60.4)                                                                          |
| <b>Reasons for cycle delay: (49 cycle delay)</b> <ul style="list-style-type: none"> <li>- Toxicity</li> <li>- Department organization</li> <li>- Department organization + toxicity</li> <li>- Other reasons</li> <li>- Patient convenience</li> </ul>                                                                                          | 29 (59.2)<br>6 (12.2)<br>1 (2.0)<br>7 (14.3)<br>6 (12.2)                           |

**Table S4: quality of life**

| QLQ-C30                | Before initiation of neoadjuvant treatment |      |      | After neoadjuvant chemotherapy, before surgery |      |      | After surgery , before adjuvant treatment |      |      | After adjuvant treatment (first questionnaire) |      |      |
|------------------------|--------------------------------------------|------|------|------------------------------------------------|------|------|-------------------------------------------|------|------|------------------------------------------------|------|------|
| Score                  | N                                          | Mean | SD   | N                                              | Mean | SD   | N                                         | Mean | SD   | N                                              | Mean | SD   |
| Global health status   | 58                                         | 69.5 | 21.0 | 44                                             | 59.5 | 17.0 | 33                                        | 54.0 | 19.0 | 44                                             | 65.5 | 17.9 |
| Physical functioning   | 60                                         | 91.6 | 13.9 | 43                                             | 82.4 | 17.3 | 33                                        | 66.5 | 25.3 | 44                                             | 79.9 | 16.7 |
| Role functioning       | 60                                         | 88.6 | 19.5 | 42                                             | 71.0 | 29.0 | 33                                        | 58.1 | 30.7 | 44                                             | 65.5 | 27.0 |
| Emotional functioning  | 59                                         | 78.0 | 18.3 | 44                                             | 75.7 | 20.4 | 32                                        | 72.1 | 21.0 | 44                                             | 80.1 | 18.5 |
| Cognitive functioning  | 60                                         | 90.8 | 16.6 | 43                                             | 87.6 | 14.6 | 32                                        | 84.4 | 16.9 | 44                                             | 84.5 | 17.4 |
| Social functioning     | 59                                         | 91.0 | 15.6 | 43                                             | 72.1 | 26.2 | 33                                        | 65.2 | 28.4 | 44                                             | 76.5 | 25.0 |
| Fatigue                | 60                                         | 25.3 | 21.8 | 44                                             | 45.8 | 25.6 | 33                                        | 50.7 | 27.1 | 44                                             | 42.8 | 26.4 |
| Nausea/vomiting        | 60                                         | 10.8 | 21.0 | 44                                             | 20.1 | 19.9 | 33                                        | 16.7 | 24.3 | 44                                             | 16.7 | 21.0 |
| Pain                   | 59                                         | 17.8 | 22.1 | 44                                             | 14.4 | 17.8 | 32                                        | 38.0 | 26.5 | 44                                             | 23.5 | 20.1 |
| Dyspnea                | 56                                         | 14.9 | 25.4 | 44                                             | 15.9 | 23.3 | 32                                        | 33.3 | 30.5 | 43                                             | 28.7 | 24.8 |
| Insomnia               | 58                                         | 27.0 | 30.9 | 44                                             | 22.0 | 26.8 | 33                                        | 32.3 | 32.8 | 44                                             | 23.5 | 28.4 |
| Appetite loss          | 59                                         | 19.2 | 31.1 | 43                                             | 40.3 | 39.5 | 33                                        | 39.4 | 34.8 | 44                                             | 36.4 | 33.6 |
| Constipation           | 59                                         | 14.7 | 25.0 | 42                                             | 32.5 | 32.5 | 31                                        | 14.0 | 25.5 | 44                                             | 15.9 | 23.3 |
| Diarrhoea              | 60                                         | 5.6  | 16.4 | 44                                             | 11.4 | 18.9 | 33                                        | 33.3 | 31.2 | 43                                             | 23.3 | 24.7 |
| Financial difficulties | 59                                         | 10.7 | 25.1 | 43                                             | 11.6 | 21.7 | 32                                        | 17.7 | 28.1 | 44                                             | 16.7 | 27.4 |
| STO-22                 | Before initiation of neoadjuvant treatment |      |      | After neoadjuvant chemotherapy, before surgery |      |      | After surgery , before adjuvant treatment |      |      | After adjuvant treatment (first questionnaire) |      |      |
| Score                  | N                                          | Mean | SD   | N                                              | Mean | SD   | N                                         | Mean | SD   | N                                              | Mean | SD   |
| Body image             | 58                                         | 5.2  | 13.7 | 43                                             | 22.5 | 26.9 | 33                                        | 20.2 | 28.8 | 42                                             | 15.1 | 22.3 |
| Dysphagia              | 60                                         | 21.9 | 24.9 | 40                                             | 19.4 | 25.8 | 32                                        | 24.7 | 24.8 | 42                                             | 11.1 | 16.3 |
| Pain                   | 60                                         | 21.6 | 17.2 | 41                                             | 18.5 | 19.6 | 32                                        | 23.7 | 20.9 | 42                                             | 22.6 | 18.0 |
| Reflux                 | 60                                         | 15.4 | 15.5 | 42                                             | 14.7 | 16.0 | 33                                        | 17.3 | 18.5 | 42                                             | 16.3 | 19.8 |
| Food restrictions      | 60                                         | 21.0 | 21.7 | 43                                             | 32.0 | 27.2 | 32                                        | 34.2 | 19.6 | 42                                             | 24.4 | 22.3 |
| Anxiety                | 60                                         | 41.3 | 22.0 | 43                                             | 39.8 | 25.0 | 33                                        | 39.4 | 25.6 | 41                                             | 34.1 | 24.6 |
| Dry mouth              | 59                                         | 12.4 | 23.1 | 42                                             | 38.9 | 36.0 | 33                                        | 36.4 | 33.7 | 42                                             | 25.4 | 29.3 |
| Trouble with taste     | 60                                         | 11.7 | 23.6 | 43                                             | 41.9 | 36.4 | 31                                        | 28.0 | 32.3 | 41                                             | 25.2 | 30.5 |
| Hair fall              | 3                                          | 11.1 | 19.2 | 18                                             | 27.8 | 32.8 | 16                                        | 25.0 | 39.4 | 7                                              | 47.6 | 32.5 |

SD: standard
